# Supplementary material for: Generativity and Gendered Pathways to Health: The Role of Human, Social, and Financial Capital Past Mid-Life
Source: MDPI journal article supplement (doi:10.3390/ijerph19094956), 2022-04-19
Supplement: s1 [file s1]

## Supplementary Materials

**Table S1.** Missing data analyses.

| Variable                                | Not missing  | Missing      | $\chi^2$ or<br><i>t</i> -statistic ( <i>df</i> ) |
|-----------------------------------------|--------------|--------------|--------------------------------------------------|
|                                         | <i>n</i> (%) | <i>n</i> (%) |                                                  |
| Generativity, <i>Mean</i> ( <i>SD</i> ) | 8.18 (2.90)  | 7.91 (2.48)  | <i>t</i> (983) = 0.44                            |
| Age                                     |              |              |                                                  |
| 45–55                                   | 277 (28.79)  | 5 (21.74)    | $\chi^2(2) = 3.41$                               |
| 56–65                                   | 445 (46.26)  | 15 (65.22)   |                                                  |
| >65                                     | 240 (24.95)  | 3 (13.04)    |                                                  |
| Gender                                  |              |              |                                                  |
| Men                                     | 399 (41.48)  | 3 (13.04)    | $\chi^2(1) = 7.52^{**}$                          |
| Women                                   | 563 (58.52)  | 20 (86.96)   |                                                  |
| Marital status                          |              |              |                                                  |
| Married                                 | 580 (60.29)  | 14 (60.87)   | $\chi^2(2) = 0.46$                               |
| Single                                  | 256 (26.61)  | 7 (30.43)    |                                                  |
| Divorced or widowed                     | 126 (13.10)  | 2 (8.70)     |                                                  |
| Educational attainment                  |              |              |                                                  |
| Below college                           | 394 (40.96)  | 10 (43.48)   | $\chi^2(1) = 0.06$                               |
| College or above                        | 568 (59.04)  | 13 (56.52)   |                                                  |

\*\*\*  $p < 0.001$ , \*\*  $p < 0.01$ , \*  $p < 0.05$ .

**Table S2.** Correlation of latent variables.

|                      | 1        | 2        | 3        | 4        | 5        | 6  |
|----------------------|----------|----------|----------|----------|----------|----|
| 1. Human capital     | --       |          |          |          |          |    |
| 2. Social capital    | 0.64 *** | --       |          |          |          |    |
| 3. Financial capital | 0.51 *** | 0.36 *** | --       |          |          |    |
| 4. Generativity      | 0.63 *** | 0.59 *** | 0.41 *** | --       |          |    |
| 5. Physical health   | 0.62 *** | 0.42 *** | 0.70 *** | 0.54 *** | --       |    |
| 6. Mental health     | 0.59 *** | 0.49 *** | 0.64 *** | 0.52 *** | 0.73 *** | -- |

\*\*\*  $p < 0.001$ , \*\*  $p < 0.01$ , \*  $p < 0.05$ .

**Table S3.** Effect of covariates among total participants.

| Variable                            | Generativity | Physical health | Mental health |
|-------------------------------------|--------------|-----------------|---------------|
|                                     | $\beta$      | $\beta$         | $\beta$       |
| Age ( <i>ref</i> : age 65+)         |              |                 |               |
| 45–55                               | –0.03        | 0.06            | –0.13 ***     |
| 55–65                               | –0.07        | 0.06            | –0.10 **      |
| Woman ( <i>ref</i> : man)           | 0.13 ***     | –0.03           | 0.003         |
| Married ( <i>ref</i> : not married) | 0.06         | 0.09 **         | 0.06 *        |
| Work ( <i>ref</i> : not working)    | –0.01        | –0.08           | –0.05         |
| Income                              | 0.16 ***     | 0.11 **         | 0.13 ***      |
| Asset                               | 0.09 **      | 0.20 ***        | 0.15 ***      |
| Financial ownerships                | 0.24 ***     | 0.21 ***        | 0.28 ***      |
| Number of chronic diseases          | –0.05        | –0.22 ***       | –0.10 ***     |

$\beta$  = standardized path coefficients. \*\*\*  $p < 0.001$ , \*\*  $p < 0.01$ , \*  $p < 0.05$ .
